# Supplementary material for: Selective recognition of “solvent” molecules in solution and the solid state by 1,4-dimethoxypillar[5]arene driven by attractive forces
Source: Royal Society of Chemistry journal article supplement (doi:10.1039/c3nj01498c), 2013-12-10
Supplement: c3nj01498c.pdf [file c3nj01498c.pdf]

## Electronic Supplementary Information

*for*  
**NJC**

### **Selective recognition of “solvent” molecules in solution and the solid state by 1,4-dimethoxypillar[5]arene driven by attractive forces\*\***

Li-Li Tan, Yumo Zhang, Bao Li, Kai Wang, Sean Xiao-An Zhang,\* Yanchun Tao,  
and Ying-Wei Yang\*

---

[\*] State Key Laboratory of Supramolecular Structure and Materials College of  
Chemistry, Jilin University, 2699 Qianjin Street, Changchun, Jilin 130012 P. R.  
China

Email: (Y.W.Y.) ywyang@jlu.edu.cn or yywfrank@gmail.com

[\*\*] This research was supported by the National Natural Science Foundation of  
China (21272093), the Research Fund for the Doctoral Program of Higher  
Education of China (20120061120117), and the Innovation Program of the  
State Key Laboratory of Supramolecular Structure and Materials.

## Table of Contents

|                                                                                                                                                                                                 |            |
|-------------------------------------------------------------------------------------------------------------------------------------------------------------------------------------------------|------------|
| <b>1. Association constant determination for the complexation of<br/>1,4-dimethoxypillar[5]arene (DMP[5]A) with acetonitrile,<br/>dichloromethane, ethyl acetate, acetone, and hexane .....</b> | <b>S3</b>  |
| <b>2. X-ray crystal data analysis.....</b>                                                                                                                                                      | <b>S9</b>  |
| <b>3. MALDI-TOF-MS spectra of acetonitrile⊂DMP[5]A.....</b>                                                                                                                                     | <b>S12</b> |
| <b>4. Computational calculation data for the host-guest complexation of<br/>DMP[5]A and small organic molecules.....</b>                                                                        | <b>S13</b> |
| <b>5. Reference.....</b>                                                                                                                                                                        | <b>S29</b> |

# 1. Association constant determination for the complexation of 1,4-dimethoxypillar[5]arene (DMP[5]A) with acetonitrile, dichloromethane, ethyl acetate, acetone, and hexane

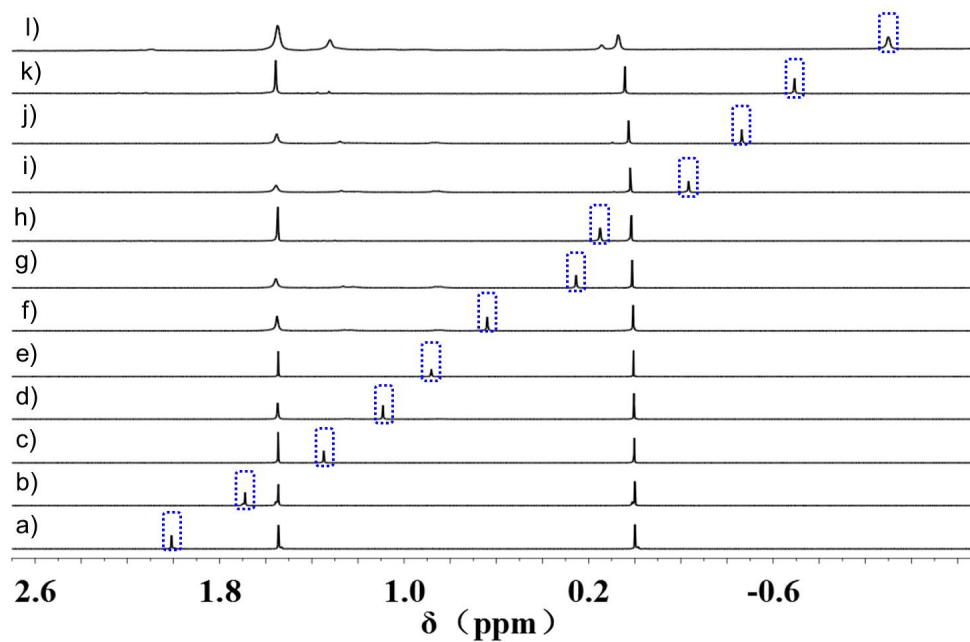

**Figure S1.** Partial  $^1\text{H}$  NMR spectra (300 MHz,  $\text{CDCl}_3$ , 298 K) of acetonitrile at the concentration of 5 mM upon addition of DMP[5]A: (a) 0 mM; (b) 4 mM; (c) 8 mM; (d) 12 mM; (e) 16 mM; (f) 20 mM; (g) 30 mM; (h) 40 mM; (i) 50 mM; (j) 70 mM; (k) 100 mM; (l) 150 mM. This set of data was used for the non-linear curve-fitting.

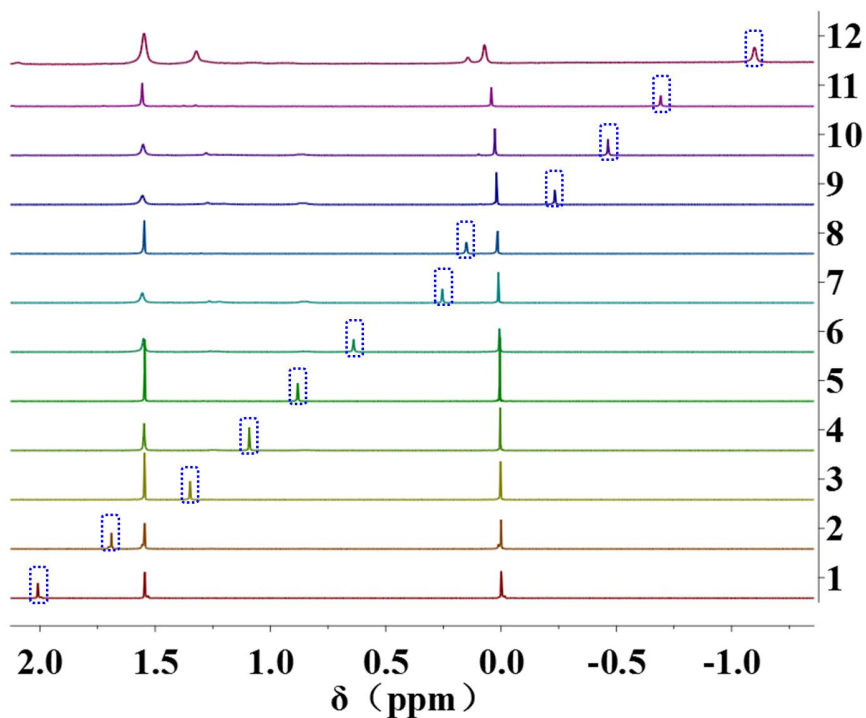

**Figure S2.** Partial  $^1\text{H}$  NMR spectra (300 MHz,  $\text{CDCl}_3$ , 298 K) of acetonitrile at the concentration of 5 mM upon addition of DMP[5]A: (1) 0 mM; (2) 4 mM; (3) 8 mM; (4) 12 mM; (5) 16 mM; (6) 20 mM; (7) 30 mM; (8) 40 mM; (9) 50 mM; (10) 70 mM; (11) 100 mM; (12) 150 mM. Repetition of the experimental data in Figure S1.

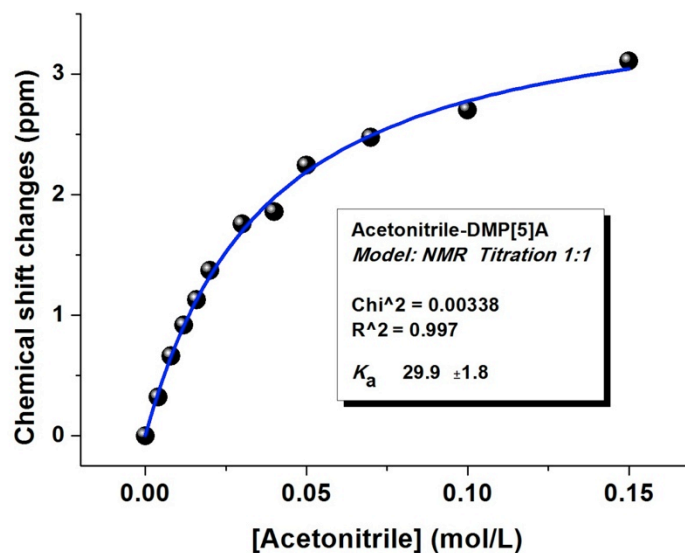

**Figure S3.** The non-linear curve-fitting (NMR titrations) for the complexation of acetonitrile (5 mM) with DMP[5]A in  $\text{CDCl}_3$  at 298 K (Figure S2). The concentration of DMP[5]A was 0, 4, 8, 12, 16, 20, 30, 40, 50, 70, 100 and 150 mM, respectively. Association constant ( $K_a$ ) is calculated to be  $29.9 \text{ M}^{-1}$ .

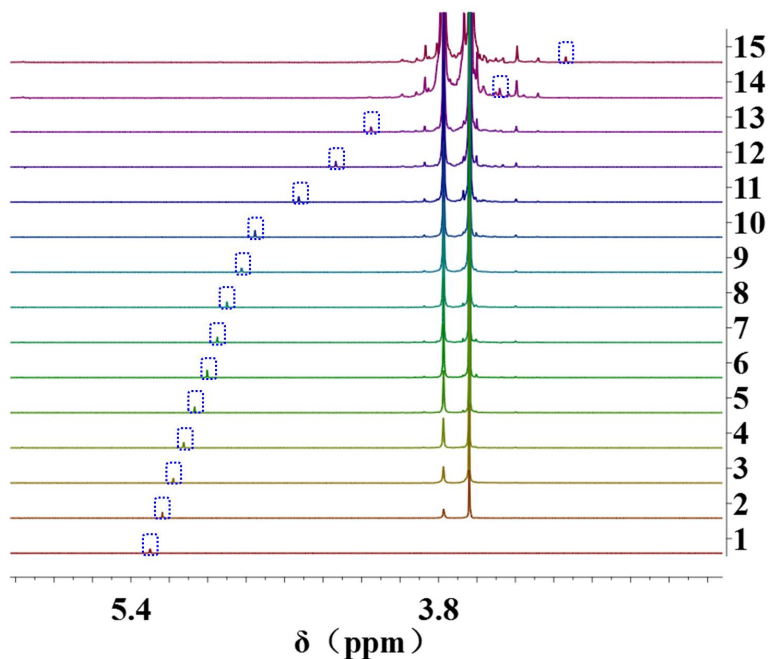

**Figure S4.** Partial  $^1\text{H}$  NMR spectra (300 MHz,  $\text{CDCl}_3$ , 298 K) of dichloromethane at the concentration of 7.8 mM upon addition of DMP[5]A: (1) 0 mM; (2) 2 mM; (3) 4 mM; (4) 6 mM; (5) 8 mM; (6) 10 mM; (7) 12 mM; (8) 14 mM; (9) 17 mM; (10) 20 mM; (11) 30 mM; (12) 40 mM; (13) 50 mM; (14) 100 mM; (15) 140 mM. Repetition of the experiments in Fig. 4.

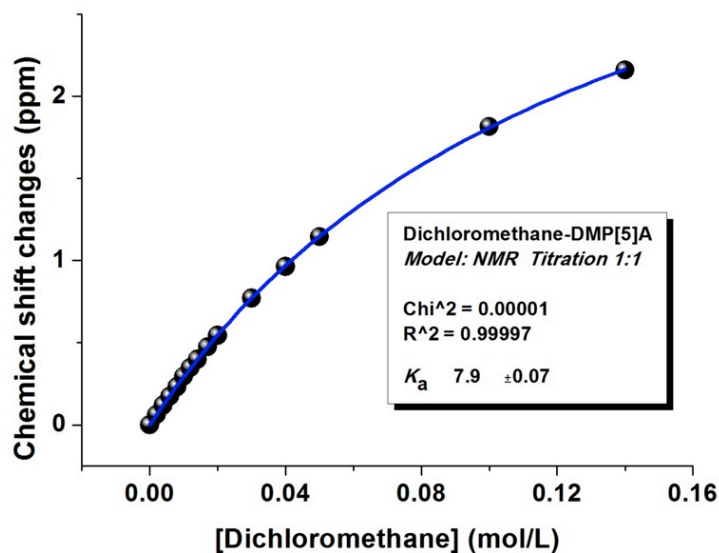

**Figure S5.** The non-linear curve-fitting (NMR titrations) for the complexation of dichloromethane (7.8 mM) with DMP[5]A in  $\text{CDCl}_3$  at 298 K (Figure S4). The concentration of DMP[5]A was 0, 2, 4, 6, 8, 10, 12, 14, 17, 20, 30, 40, 50, 100 and 140 mM, respectively. Association constant ( $K_a$ ) is calculated to be  $7.9 \text{ M}^{-1}$ .

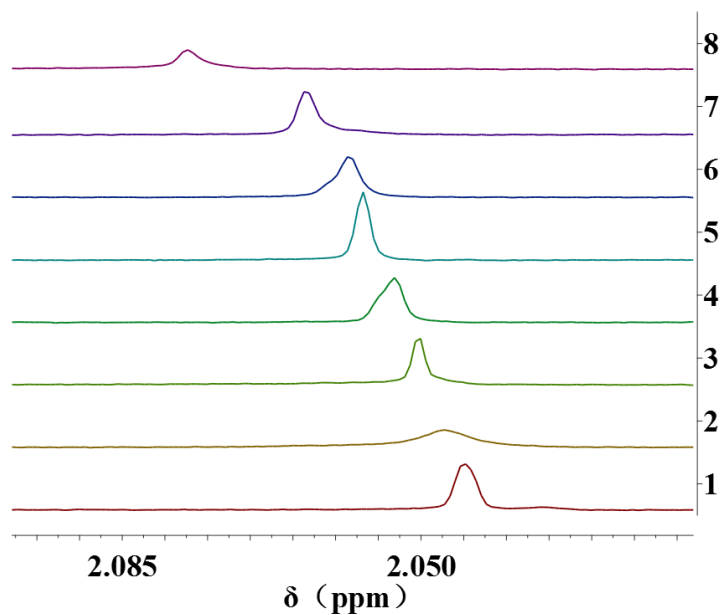

**Figure S6.** Partial  $^1\text{H}$  NMR spectra (300 MHz,  $\text{CDCl}_3$ , 298 K) of ethyl acetate at the concentration of 2.5 mM upon addition of DMP[5]A: (1) 0 mM; (2) 8 mM; (3) 16 mM; (4) 30 mM; (5) 40 mM; (6) 50 mM; (7) 70 mM; (8) 100 mM.

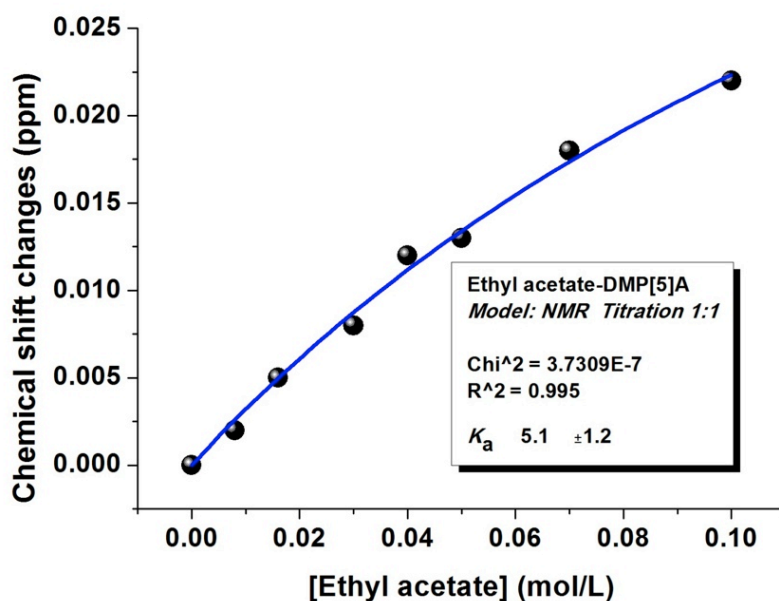

**Figure S7.** The non-linear curve-fitting (NMR titrations) for the complexation of ethyl acetate (2.5 mM) with DMP[5]A in  $\text{CDCl}_3$  at 298 K (Figure S6). The concentration of DMP[5]A was 0, 8, 16, 30, 40, 50, 70 and 100 mM, respectively. Association constant ( $K_a$ ) is calculated to be  $5.1 \text{ M}^{-1}$ .

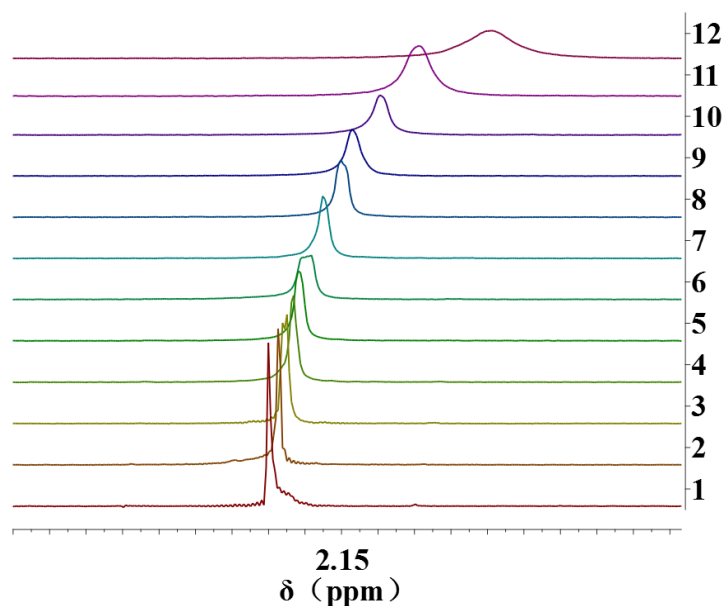

**Figure S8.** Partial  $^1\text{H}$  NMR spectra (300 MHz,  $\text{CDCl}_3$ , 298 K) of acetone at the concentration of 5 mM upon addition of DMP[5]A: (1) 0 mM; (2) 4 mM; (3) 8 mM; (4) 12 mM; (5) 16 mM; (6) 20 mM; (7) 30 mM; (8) 40 mM; (9) 50 mM; (10) 70 mM; (11) 100 mM; (12) 150 mM.

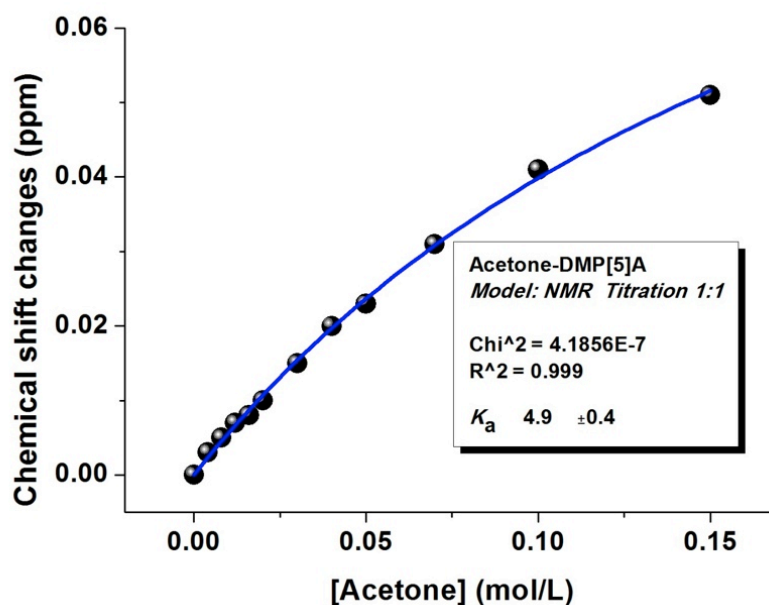

**Figure S9.** The non-linear curve-fitting (NMR titrations) for the complexation of acetone (5 mM) with DMP[5]A in  $\text{CDCl}_3$  at 298 K (Figure S8). The concentration of DMP[5]A was 0, 4, 8, 12, 16, 20, 30, 40, 50, 70, 100 and 150 mM, respectively. Association constant ( $K_a$ ) is calculated to be  $4.9 \text{ M}^{-1}$ .

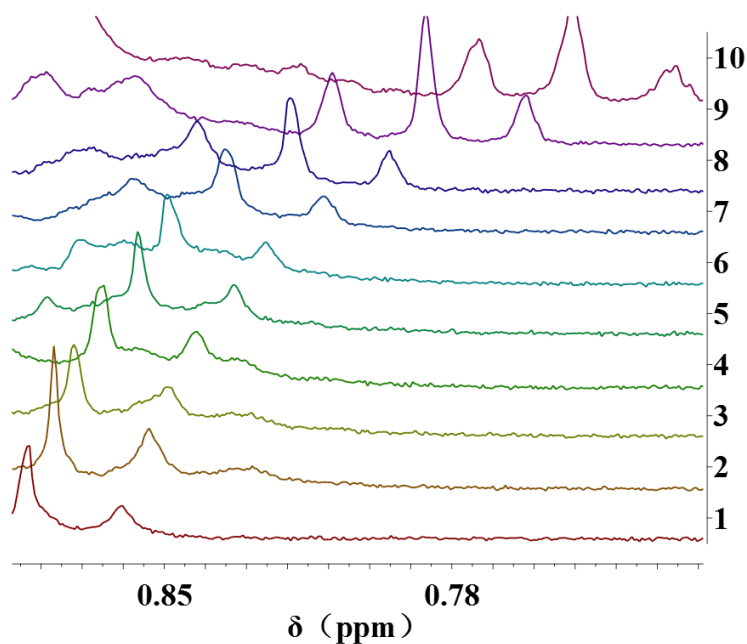

**Figure S10.** Partial  $^1\text{H}$  NMR spectra (300 MHz,  $\text{CDCl}_3$ , 298 K) of hexane at the concentration of 2.5 mM upon addition of DMP[5]A: (1) 0 mM; (2) 4 mM; (3) 8 mM; (4) 12 mM; (5) 16 mM; (6) 20 mM; (7) 30 mM; (8) 40 mM; (9) 70 mM; (10) 100 mM.

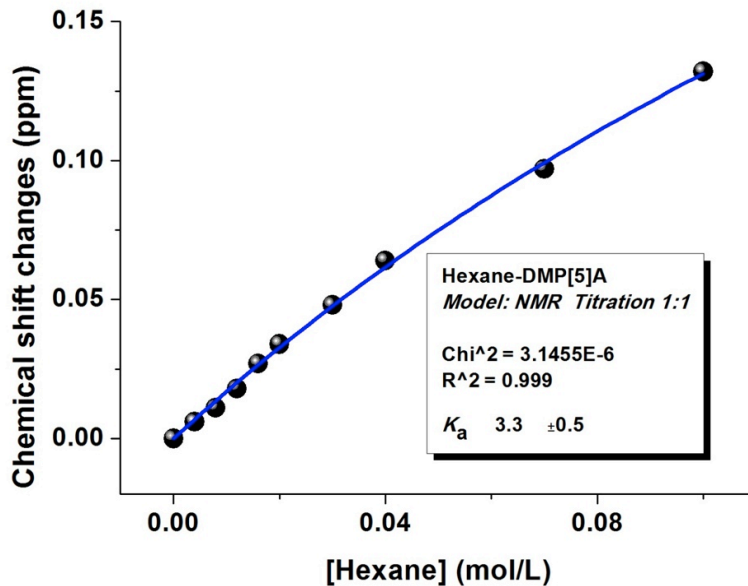

**Figure S11.** The non-linear curve-fitting (NMR titrations) for the complexation of hexane (2.5 mM) with DMP[5]A in  $\text{CDCl}_3$  at 298 K (Figure S10). The concentration of DMP[5]A was 0, 4, 8, 12, 16, 20, 30, 40, 70, and 100 mM respectively. Association constant ( $K_a$ ) is calculated to be  $3.3 \text{ M}^{-1}$ .



## 2. X-ray crystal data analysis

The size of DMP[5]A was estimated according to the reference.<sup>[S1]</sup>

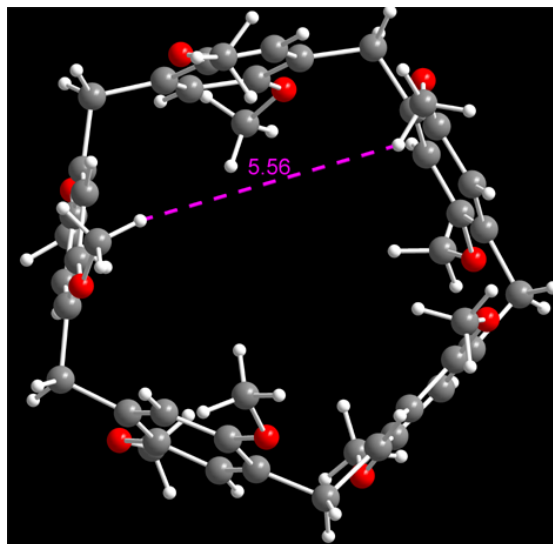

**Figure S12.** Crystal structure of DMP[5]A. Oxygen atoms are red, carbon atoms are medium grey and hydrogen atoms are white. Dashes represent the shortest distance of two hydrogens (purple). Size parameter: H  $\cdots$  H distance (Å), 5.56.

The smallest size of DMP[5]A (Å):  $5.56 - 2 \times \text{vander Waals Radium of hydrogen}$   
 $= 5.56 - 2 \times 1.10 = 3.36$ .

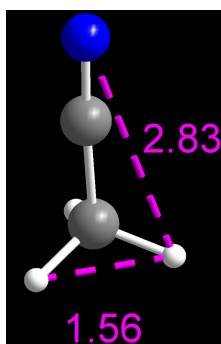

**Figure S13.** Crystal structure of acetonitrile. Nitrogen atom is blue, carbon atoms are medium grey and hydrogen atoms are white. Dashes represent the longest length and width of acetonitrile (purple). Size parameter: N  $\cdots$  H distance (Å), 2.83; H  $\cdots$  H distance (Å), 1.56.

The longest length of acetonitrile (Å):  $2.83 + \text{vander Waals Radium of hydrogen} + \text{vander Waals Radium of nitrogen} = 2.83 + 1.10 + 1.5 = 5.43$ .

The longest width of acetonitrile (Å):  $1.56 + 2 \times \text{vander Waals Radium of hydrogen} = 1.56 + 2 \times 1.10 = 3.76$ .

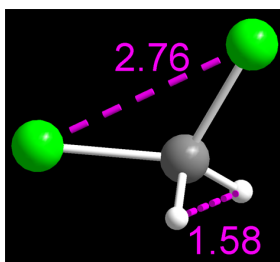

**Figure S14.** Crystal structure of dichloromethane. Chlorine atoms are green, carbon atoms are medium grey and hydrogen atoms are white. Dashes represent the longest length and width of dichloromethane (purple). Size parameter: Cl  $\cdots$  Cl distance (Å), 2.76; H  $\cdots$  H distance (Å), 1.58.

The longest length of dichloromethane (Å):  $2.76 + 2 \times \text{vander Waals Radium of chlorine} = 2.76 + 2 \times 1.80 = 6.36$ .

The longest width of dichloromethane (Å):  $1.58 + 2 \times \text{vander Waals Radium of hydrogen} = 1.58 + 2 \times 1.10 = 3.78$ .

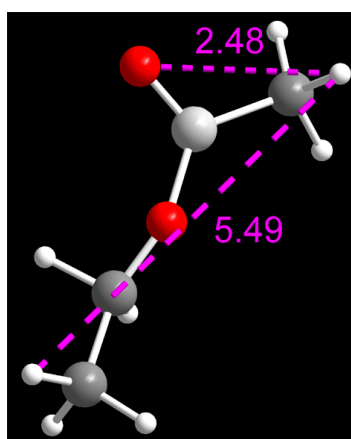

**Figure S15.** Crystal structure of ethyl acetate. Oxygen atoms are red, carbon atoms are medium grey and hydrogen atoms are white. Dashes represent the longest length and width of ethyl acetate (purple). Size parameter: H  $\cdots$  H distance (Å), 5.49; H  $\cdots$  O distance (Å), 2.48.

The longest length of ethyl acetate (Å):  $5.49 + 2 \times \text{vander Waals Radium of hydrogen} = 5.49 + 2 \times 1.10 = 7.69$ .

The longest width of ethyl acetate (Å):  $2.48 + \text{vander Waals Radium of hydrogen} + \text{vander Waals Radium of oxygen} = 2.48 + 1.40 + 1.1 = 4.98$ .

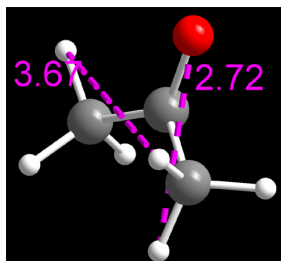

**Figure S16.** Crystal structure of acetone. Oxygen atoms are red, carbon atoms are medium grey and hydrogen atoms are white. Dashes represent the longest length and width of acetone (purple). Size parameter: H  $\cdots$  H distance (Å), 3.67; H  $\cdots$  O distance (Å), 2.72.

The longest length of acetone (Å):  $3.67 + 2 \times \text{vander Waals Radium of hydrogen} = 3.67 + 2 \times 1.10 = 5.87$ .

The longest width of acetone (Å):  $2.72 + \text{vander Waals Radium of hydrogen} + \text{vander Waals Radium of oxygen} = 2.72 + 1.40 + 1.1 = 5.22$ .

### 3. MALDI-TOF-MS spectra of acetonitrileCDMP[5]A

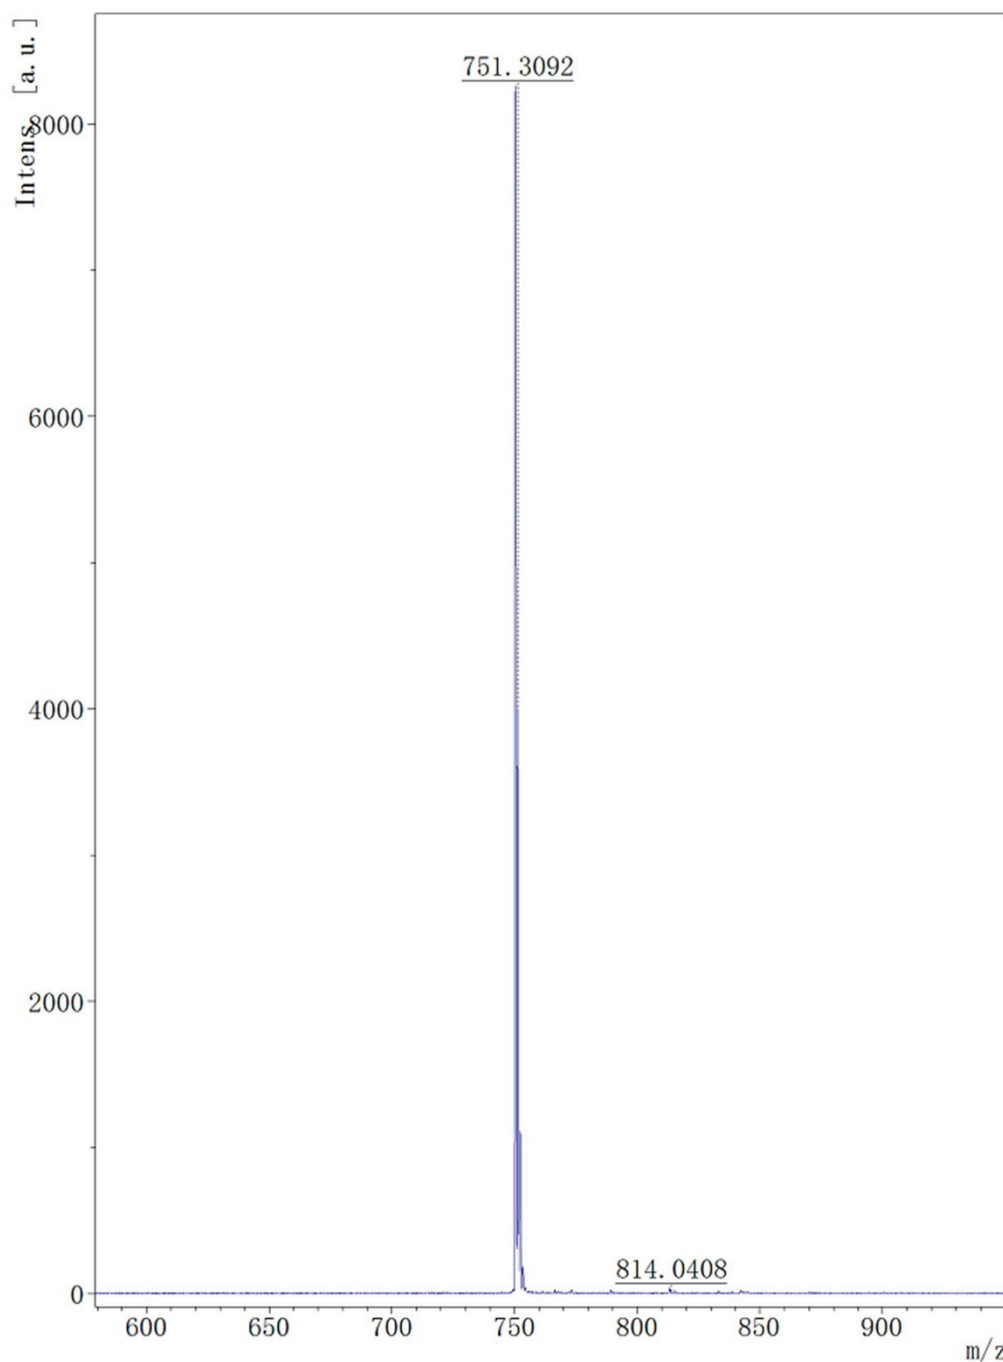

**Figure S17.** MS (MALDI-TOF) of acetonitrileCDMP[5]A. Peak at  $m/z$  814.0408 (100%) corresponds to  $[M + \text{CH}_3\text{CN} + \text{Na}]^+$ , peak at  $m/z$  751.3092 (100%) corresponding to  $[M + \text{H}]^+$ .

#### 4. Computational calculation data for the host-guest complexation of DMP[5]A and small organic molecules

##### Acetonitrile⊂DMP[5]A:

|   |             |             |             |
|---|-------------|-------------|-------------|
| C | -2.08709800 | 4.53744900  | 0.08990700  |
| C | -2.88043000 | 3.23989100  | 0.10093000  |
| C | -0.58582700 | 4.29663500  | 0.08552100  |
| C | -3.21231800 | 2.60117900  | -1.09827400 |
| C | -3.26491600 | 2.63176000  | 1.30708000  |
| C | 0.12367000  | 4.20210000  | 1.28624600  |
| C | 0.11605100  | 4.12006100  | -1.11904400 |
| H | -2.89750100 | 3.07223600  | -2.02041800 |
| C | -3.89821900 | 1.38320500  | -1.11407700 |
| C | -3.95279000 | 1.41461000  | 1.29209500  |
| O | -2.92297900 | 3.29855300  | 2.46451900  |
| H | -0.43128000 | 4.32508300  | 2.20813000  |
| C | 1.49393800  | 3.92494500  | 1.30621900  |
| C | 1.48639500  | 3.84690400  | -1.09878100 |
| O | -0.61865900 | 4.23880800  | -2.27634500 |
| C | -4.27330100 | 0.76964700  | 0.09357100  |
| O | -4.24946500 | 0.72308300  | -2.26893800 |
| H | -4.23342400 | 0.92418700  | 2.21600200  |
| C | -3.36294400 | 2.75949600  | 3.69750100  |
| C | 2.19387700  | 3.73887200  | 0.10285800  |
| O | 2.23157800  | 3.81348400  | 2.46632900  |
| H | 2.03364400  | 3.68876200  | -2.01915900 |
| C | 0.03587100  | 3.99886600  | -3.51315900 |
| C | -4.96707400 | -0.58314700 | 0.10383700  |
| C | -3.82497000 | 1.26860600  | -3.50907300 |

|   |             |             |             |
|---|-------------|-------------|-------------|
| H | -4.45678200 | 2.67509700  | 3.73786500  |
| H | -3.02960000 | 3.45559900  | 4.46966100  |
| H | -2.92559600 | 1.77099500  | 3.89117800  |
| C | 3.67330500  | 3.38695900  | 0.09673700  |
| C | 1.58003300  | 4.07249700  | 3.69621900  |
| H | 0.85865000  | 4.70594500  | -3.68032400 |
| H | -0.72047700 | 4.14662700  | -4.28616400 |
| H | 0.41858000  | 2.97289800  | -3.57440600 |
| H | -5.60618500 | -0.65029500 | 0.98738400  |
| H | -5.60575200 | -0.66684700 | -0.77898200 |
| C | -3.97719200 | -1.73751900 | 0.11144000  |
| H | -4.24045400 | 2.27089900  | -3.67500100 |
| H | -4.20666300 | 0.59553800  | -4.27895000 |
| H | -2.73107300 | 1.31181700  | -3.57715000 |
| H | 4.14074800  | 3.82765000  | -0.78734300 |
| H | 4.15050300  | 3.82002800  | 0.97897900  |
| C | 3.90884800  | 1.88477400  | 0.09041100  |
| H | 1.16379300  | 5.08780400  | 3.73078300  |
| H | 2.34269600  | 3.97259300  | 4.47100200  |
| H | 0.77284900  | 3.35377900  | 3.89085200  |
| C | -3.47867800 | -2.25114700 | -1.08973200 |
| C | -3.50857500 | -2.28736600 | 1.31575100  |
| C | 4.02548700  | 1.17714600  | 1.29097900  |
| C | 3.97318700  | 1.16579400  | -1.11548700 |
| H | -3.83700600 | -1.81009500 | -2.01096800 |
| C | -2.52816500 | -3.27551200 | -1.10927900 |
| C | -2.56126900 | -3.31534500 | 1.29707300  |
| O | -4.03012200 | -1.75387000 | 2.47581900  |
| H | 3.95992500  | 1.74078100  | 2.21343700  |
| C | 4.18837500  | -0.21128700 | 1.30887500  |

|   |             |             |             |
|---|-------------|-------------|-------------|
| C | 4.13819000  | -0.22206900 | -1.09627500 |
| O | 3.87005200  | 1.90330100  | -2.27262800 |
| C | -2.05262100 | -3.81925600 | 0.09612400  |
| O | -2.01089400 | -3.81083400 | -2.26655900 |
| H | -2.17543600 | -3.73238600 | 2.21912600  |
| C | -3.64443500 | -2.33660200 | 3.70700800  |
| C | 4.24192500  | -0.93119800 | 0.10424300  |
| O | 4.29853800  | -0.94979300 | 2.46834700  |
| H | 4.16501400  | -0.78986200 | -2.01725800 |
| C | 3.85211600  | 1.20851000  | -3.51046700 |
| C | -0.97777800 | -4.89495800 | 0.10105700  |
| C | -2.40891400 | -3.24116200 | -3.50439800 |
| H | -3.90177500 | -3.40292200 | 3.75118100  |
| H | -4.19759800 | -1.80315200 | 4.48248500  |
| H | -2.56761900 | -2.22601200 | 3.89206000  |
| C | 4.36296300  | -2.44716100 | 0.09562700  |
| C | 4.32681500  | -0.25317700 | 3.70052300  |
| H | 4.78079300  | 0.64686100  | -3.67414400 |
| H | 3.76096100  | 1.97444300  | -4.28276900 |
| H | 2.99667400  | 0.52525600  | -3.57651800 |
| H | -1.09641400 | -5.52569700 | -0.78342700 |
| H | -1.10790500 | -5.52655000 | 0.98298500  |
| C | 0.42560200  | -4.30927900 | 0.10723600  |
| H | -3.49100400 | -3.33316000 | -3.66384400 |
| H | -1.88755500 | -3.80896800 | -4.27719600 |
| H | -2.11874000 | -2.18575400 | -3.57442600 |
| H | 4.92247200  | -2.76904700 | 0.97710700  |
| H | 4.92575600  | -2.75458000 | -0.78932200 |
| C | 3.00603200  | -3.13334500 | 0.09011700  |
| H | 5.16107400  | 0.45893800  | 3.74675300  |

|   |             |             |             |
|---|-------------|-------------|-------------|
| H | 4.46076100  | -1.01093100 | 4.47499700  |
| H | 3.38983000  | 0.28880300  | 3.88559100  |
| C | 1.06389300  | -3.98468000 | -1.09449500 |
| C | 1.10030500  | -4.04659600 | 1.31078000  |
| C | 2.37378900  | -3.46957600 | 1.29070000  |
| C | 2.33504600  | -3.40366900 | -1.11483100 |
| H | 0.52891200  | -4.18043400 | -2.01485500 |
| O | 0.43591000  | -4.38525500 | 2.47102400  |
| H | 2.89415500  | -3.24156100 | 2.21266900  |
| O | 3.00059500  | -3.07079000 | -2.27198300 |
| C | 1.11483800  | -4.21275300 | 3.70143200  |
| C | 2.33207700  | -3.26451000 | -3.50940400 |
| H | 2.04719800  | -4.79123700 | 3.73678300  |
| H | 0.43783200  | -4.57865000 | 4.47582800  |
| H | 1.34724000  | -3.15720300 | 3.89588100  |
| H | 2.08327900  | -4.32070200 | -3.67500000 |
| H | 3.03170700  | -2.94032000 | -4.28195200 |
| H | 1.41880000  | -2.66053200 | -3.57321800 |
| H | -0.92861800 | 0.48773800  | -0.23301800 |
| H | 0.85269800  | 0.54471500  | -0.21754600 |
| H | 0.01164500  | -1.02760200 | -0.22225200 |
| C | -0.00633200 | -0.00211800 | -2.05130400 |
| C | -0.01823700 | 0.00072400  | -0.59254500 |
| N | 0.00137400  | -0.00439000 | -3.21403300 |
| H | -2.36156100 | 5.11506800  | -0.79634200 |
| H | -2.35149300 | 5.12843100  | 0.96995400  |



**DichloromethaneCDMP[5]A:**

|   |             |             |             |
|---|-------------|-------------|-------------|
| C | -4.89847200 | -0.63224800 | 0.75784900  |
| C | -3.89432300 | -1.77374200 | 0.70348300  |
| C | -4.23454300 | 0.72917800  | 0.61553000  |
| C | -3.15870300 | -2.12264500 | 1.84098700  |
| C | -3.65096300 | -2.47828100 | -0.48621600 |
| C | -4.02138900 | 1.29293200  | -0.64825100 |
| C | -3.78916300 | 1.44057100  | 1.74088400  |
| H | -3.35675200 | -1.57357100 | 2.75279600  |
| C | -2.18409800 | -3.12156000 | 1.80354400  |
| C | -2.66633400 | -3.47323500 | -0.52471900 |
| O | -4.40939000 | -2.11795600 | -1.57941700 |
| H | -4.37587700 | 0.74333300  | -1.51286800 |
| C | -3.36860200 | 2.52193400  | -0.80181500 |
| C | -3.13092300 | 2.66338300  | 1.58708500  |
| O | -4.03721900 | 0.86296300  | 2.96921400  |
| C | -1.90588300 | -3.79710200 | 0.60258300  |
| O | -1.45180100 | -3.50978900 | 2.90243800  |
| H | -2.45328700 | -3.99999400 | -1.44712500 |
| C | -4.39763200 | -2.97177900 | -2.71309000 |
| C | -2.89973500 | 3.21804000  | 0.32586900  |
| O | -3.14857100 | 3.12022400  | -2.02141300 |
| H | -2.75809300 | 3.20430300  | 2.44778700  |
| C | -3.72454000 | 1.60978200  | 4.13147300  |
| C | -0.79304600 | -4.83145000 | 0.52517900  |
| C | -1.70639000 | -2.86168400 | 4.13538900  |
| H | -3.42861200 | -2.95832000 | -3.22581300 |
| H | -5.15888000 | -2.58221800 | -3.39163200 |
| H | -4.64893300 | -4.00462600 | -2.43990000 |

|   |             |             |             |
|---|-------------|-------------|-------------|
| C | -2.13041300 | 4.52319400  | 0.18746200  |
| C | -3.73280800 | 2.53298100  | -3.17272700 |
| H | -2.64612300 | 1.79500300  | 4.22221900  |
| H | -4.05646600 | 1.00596200  | 4.97832600  |
| H | -4.25038600 | 2.57317600  | 4.14807600  |
| H | -0.81929900 | -5.45667300 | 1.42248700  |
| H | -0.97646500 | -5.47851100 | -0.33692100 |
| C | 0.59444300  | -4.21791600 | 0.40103800  |
| H | -1.49484100 | -1.78595400 | 4.08114700  |
| H | -1.03760000 | -3.32304600 | 4.86474500  |
| H | -2.74469500 | -3.00262000 | 4.46311800  |
| H | -2.45713200 | 5.03662000  | -0.71979000 |
| H | -2.36580000 | 5.16606200  | 1.03941800  |
| C | -0.62516000 | 4.31130900  | 0.12378700  |
| H | -3.30608000 | 1.54652100  | -3.39281200 |
| H | -3.51025200 | 3.20792200  | -4.00121000 |
| H | -4.82131600 | 2.43702800  | -3.06825700 |
| C | 1.39004300  | -4.01417000 | 1.53309900  |
| C | 1.11075900  | -3.82756400 | -0.84493900 |
| C | 0.01026000  | 4.09602200  | -1.10227100 |
| C | 0.15775300  | 4.29079100  | 1.28897600  |
| H | 0.98351100  | -4.30932500 | 2.49147900  |
| C | 2.65203000  | -3.42006900 | 1.44512300  |
| C | 2.37769300  | -3.24602700 | -0.93578000 |
| O | 0.29356000  | -4.03217900 | -1.94162600 |
| H | -0.60377400 | 4.09661600  | -1.99425200 |
| C | 1.38381000  | 3.84951600  | -1.18137700 |
| C | 1.53089300  | 4.04327800  | 1.21047500  |
| O | -0.50597400 | 4.52283500  | 2.47718500  |
| C | 3.16282600  | -3.02357800 | 0.19851500  |

|   |             |             |             |
|---|-------------|-------------|-------------|
| O | 3.45810700  | -3.18321600 | 2.53874600  |
| H | 2.77096300  | -2.91990200 | -1.89086800 |
| C | 0.88597700  | -3.95918000 | -3.23178700 |
| C | 2.16371400  | 3.80975300  | -0.01367400 |
| O | 2.05012000  | 3.63319000  | -2.36714800 |
| H | 2.13845200  | 3.99833400  | 2.10537300  |
| C | 0.26228600  | 4.59675600  | 3.66363200  |
| C | 4.50699300  | -2.32101300 | 0.07927400  |
| C | 3.02024000  | -3.64503700 | 3.80291400  |
| H | 1.18572200  | -2.93602600 | -3.48878700 |
| H | 0.11976300  | -4.28841900 | -3.93579700 |
| H | 1.76043300  | -4.61742000 | -3.30637900 |
| C | 3.65033100  | 3.49028000  | -0.06976600 |
| C | 1.31466600  | 3.73983300  | -3.57470500 |
| H | 0.76401600  | 3.64563600  | 3.88632700  |
| H | -0.44023700 | 4.82769200  | 4.46702000  |
| H | 1.01936800  | 5.39009600  | 3.61012500  |
| H | 5.00953500  | -2.66098300 | -0.82931200 |
| H | 5.13269800  | -2.59592200 | 0.93126800  |
| C | 4.35912000  | -0.80806700 | 0.03229500  |
| H | 2.09007700  | -3.15350600 | 4.11799800  |
| H | 3.81413400  | -3.39479500 | 4.50931900  |
| H | 2.86414200  | -4.73178000 | 3.80847400  |
| H | 4.14869300  | 3.97724800  | 0.77255900  |
| H | 4.07079900  | 3.90305400  | -0.99042900 |
| C | 3.93695500  | 1.99650800  | -0.02500900 |
| H | 0.53198500  | 2.97461600  | -3.64125600 |
| H | 2.03467700  | 3.58641500  | -4.38092900 |
| H | 0.85924800  | 4.73274700  | -3.68440200 |
| C | 4.26177800  | -0.12397800 | -1.18965700 |

|    |             |             |             |
|----|-------------|-------------|-------------|
| C  | 4.26630500  | -0.06735800 | 1.21445100  |
| C  | 4.05862000  | 1.31450300  | 1.19699000  |
| C  | 4.05525500  | 1.25889800  | -1.20656400 |
| O  | 4.37442600  | -0.89056100 | -2.32966900 |
| H  | 4.33416900  | -0.60678000 | 2.15152300  |
| O  | 3.96069300  | 2.08394500  | 2.33707700  |
| H  | 3.95106200  | 1.79166000  | -2.14319800 |
| C  | 4.32243000  | -0.23326600 | -3.58392900 |
| C  | 4.12165200  | 1.44245300  | 3.58817300  |
| H  | 3.35273700  | 0.25339500  | -3.74707500 |
| H  | 4.46586400  | -1.00955300 | -4.33805500 |
| H  | 5.11997000  | 0.51470200  | -3.68329900 |
| H  | 3.34411700  | 0.68710000  | 3.76320900  |
| H  | 4.03733300  | 2.22545800  | 4.34449400  |
| H  | 5.10546800  | 0.96298700  | 3.67737900  |
| C  | -0.91042800 | -0.72224000 | -2.24832900 |
| H  | -1.70587400 | -0.24648800 | -1.68022300 |
| H  | -0.71640800 | -1.73737600 | -1.91200200 |
| Cl | 0.57966500  | 0.23974700  | -2.05920100 |
| Cl | -1.45520400 | -0.82011000 | -3.97108000 |
| H  | -5.63063000 | -0.76120000 | -0.04202100 |
| H  | -5.43227300 | -0.67040100 | 1.71089400  |

**Ethyl acetateCDMP[5]A:**

|   |             |             |             |
|---|-------------|-------------|-------------|
| C | -2.39020600 | 3.27787500  | -1.23867300 |
| C | -3.38310000 | 2.29327500  | -1.26422500 |
| H | -3.67169300 | 1.82185500  | -2.19510800 |
| C | -4.00955200 | 1.85257900  | -0.09347400 |
| C | -5.03827500 | 0.73189000  | -0.14165100 |
| H | -5.62158800 | 0.82310800  | -1.06110900 |
| H | -5.72408800 | 0.83845700  | 0.70199400  |
| C | -4.39712200 | -0.64716900 | -0.09287400 |
| C | -4.01156700 | -1.30706400 | -1.27167200 |
| C | -3.36363300 | -2.54470000 | -1.20279500 |
| H | -3.03722200 | -3.04627300 | -2.10466900 |
| C | -3.07520100 | -3.15473500 | 0.02166000  |
| C | -3.48043900 | -2.50416200 | 1.19926600  |
| C | -4.13313600 | -1.26918500 | 1.13195400  |
| H | -4.42635500 | -0.74607500 | 2.03412900  |
| C | -2.30619800 | -4.46726800 | 0.06951700  |
| H | -2.63710500 | -5.04689500 | 0.93494900  |
| H | -2.53670900 | -5.04607800 | -0.82839300 |
| C | -0.80089300 | -4.26271000 | 0.15956400  |
| C | -0.01761900 | -4.10236500 | -0.99758200 |
| C | 1.35395200  | -3.84988900 | -0.88824000 |
| H | 1.95996300  | -3.69960000 | -1.77412500 |
| C | 1.98753100  | -3.76961300 | 0.35690400  |
| C | 1.20865400  | -3.96058300 | 1.50967900  |
| C | -0.16469900 | -4.19866500 | 1.40163000  |
| H | -0.77863400 | -4.31529100 | 2.28583900  |
| C | 3.47612700  | -3.46660200 | 0.45008300  |
| H | 3.98200000  | -3.89877500 | -0.41580900 |
| C | -2.04188200 | 3.11410400  | -3.60628700 |
| H | -1.79402300 | 2.04555700  | -3.60006200 |

|   |             |             |             |
|---|-------------|-------------|-------------|
| H | -1.42595100 | 3.62277000  | -4.35063000 |
| H | -3.09860600 | 3.23972200  | -3.87556200 |
| C | -3.79423100 | -1.22231000 | -3.65894600 |
| H | -2.69979900 | -1.25991900 | -3.64243700 |
| H | -4.12280900 | -0.55176500 | -4.45544700 |
| H | -4.20192700 | -2.22347100 | -3.85089500 |
| C | -3.63663800 | -2.55690800 | 3.58937400  |
| H | -3.16763800 | -1.57868300 | 3.76064900  |
| H | -3.34411100 | -3.23909900 | 4.39016500  |
| H | -4.72734100 | -2.43211400 | 3.60559000  |
| C | 0.05405300  | -4.06434000 | -3.39841000 |
| H | 0.43646000  | -3.04338200 | -3.50913600 |
| H | -0.65004400 | -4.26537300 | -4.20781600 |
| H | 0.88450500  | -4.77929800 | -3.46096400 |
| C | 1.14727300  | -4.20000700 | 3.89469100  |
| H | 0.34235400  | -3.47593000 | 4.07823600  |
| H | 1.86539600  | -4.15241600 | 4.71569700  |
| H | 0.71287500  | -5.20730900 | 3.85467500  |
| O | -1.73997800 | 3.73160100  | -2.36340700 |
| O | -4.30936700 | -0.67068200 | -2.45267100 |
| O | -3.19312700 | -3.15061700 | 2.38372600  |
| O | -0.68185700 | -4.21903500 | -2.19556900 |
| O | 1.87381600  | -3.89545800 | 2.71797900  |
| C | -3.63175300 | 2.44382200  | 1.12285500  |
| C | -2.64986600 | 3.43901000  | 1.14717100  |
| H | -2.33823000 | 3.88652400  | 2.08238800  |
| C | -2.00794300 | 3.86411700  | -0.01984700 |
| C | -0.90273700 | 4.90910500  | 0.03821900  |
| H | -1.09792000 | 5.58312400  | 0.87647600  |
| H | -0.92268800 | 5.50321400  | -0.87886900 |
| C | 0.48244800  | 4.30100000  | 0.20045500  |
| C | 0.99922700  | 3.99841700  | 1.47213900  |

|   |             |             |             |
|---|-------------|-------------|-------------|
| C | 2.24752000  | 3.38401000  | 1.59800900  |
| H | 2.63933400  | 3.12054000  | 2.57153500  |
| C | 3.02367400  | 3.05993000  | 0.47968400  |
| C | 2.52356900  | 3.39558700  | -0.78815400 |
| C | 1.26969200  | 4.00174300  | -0.91435800 |
| H | 0.86432700  | 4.22996300  | -1.89250200 |
| C | 4.35658500  | 2.34347600  | 0.64748400  |
| H | 5.03244600  | 2.65165300  | -0.15411800 |
| H | 4.80354800  | 2.64827000  | 1.59801000  |
| C | 4.21588300  | 0.82878200  | 0.61940700  |
| C | 3.83665300  | 0.11012900  | 1.76860300  |
| C | 3.61732500  | -1.26615400 | 1.70046500  |
| H | 3.29964300  | -1.82265700 | 2.57325100  |
| C | 3.77960600  | -1.97685600 | 0.50348600  |
| C | 4.20463400  | -1.26910300 | -0.62819500 |
| C | 4.41453600  | 0.11262000  | -0.56056000 |
| H | 4.70513100  | 0.66423600  | -1.44730100 |
| H | 3.87865200  | -3.94504500 | 1.34710800  |
| C | -3.98804000 | 2.61411400  | 3.48654900  |
| H | -2.93753500 | 2.48268600  | 3.77859800  |
| H | -4.62861200 | 2.13518200  | 4.22979400  |
| H | -4.21362400 | 3.68825500  | 3.45716700  |
| C | 0.72583800  | 4.12126700  | 3.84886200  |
| H | 0.89551800  | 3.05366600  | 4.04157000  |
| H | -0.02936100 | 4.49531400  | 4.54293000  |
| H | 1.66594300  | 4.66357600  | 4.01472400  |
| C | 3.05153600  | 3.75641500  | -3.09704600 |
| H | 2.12342700  | 3.39949200  | -3.56139900 |
| H | 3.88777300  | 3.52734400  | -3.76090000 |
| H | 2.98347700  | 4.84265200  | -2.95799500 |
| C | 3.37284600  | 0.15132800  | 4.11790900  |
| H | 2.38985400  | -0.33208700 | 4.04747000  |

|   |             |             |             |
|---|-------------|-------------|-------------|
| H | 3.34811400  | 0.90338100  | 4.90903200  |
| H | 4.12354400  | -0.60908600 | 4.36955600  |
| C | 5.38495400  | -1.54459400 | -2.69387200 |
| H | 5.08712600  | -0.64650300 | -3.24945200 |
| H | 5.54389300  | -2.35764100 | -3.40586600 |
| H | 6.32009400  | -1.33680100 | -2.15981900 |
| O | -4.27572000 | 1.98302500  | 2.25290500  |
| O | 0.21233900  | 4.34625100  | 2.54908800  |
| O | 3.32526400  | 3.09338900  | -1.87225200 |
| O | 3.70523400  | 0.84272700  | 2.92752400  |
| O | 4.37010000  | -1.98688200 | -1.80193100 |
| C | 2.01217700  | 0.02724900  | -3.53135600 |
| H | 1.88689200  | 0.12014100  | -4.61041900 |
| H | 2.61488600  | -0.85788200 | -3.30307000 |
| H | 2.53674700  | 0.89067700  | -3.11650500 |
| C | 0.66268100  | -0.12995700 | -2.87218900 |
| O | -0.36780300 | -0.40296900 | -3.46712200 |
| O | 0.75454900  | 0.03766600  | -1.55066400 |
| C | -0.10340200 | 0.04995000  | 0.68495800  |
| H | 0.65426200  | -0.66731500 | 1.01105400  |
| H | -1.00342400 | -0.08851700 | 1.29134700  |
| H | 0.27606800  | 1.06165000  | 0.84859400  |
| C | -0.45696200 | -0.16508900 | -0.77157200 |
| H | -0.82329500 | -1.17639900 | -0.95917400 |
| H | -1.21478600 | 0.54195200  | -1.11539600 |



**AcetoneCDMP[5]A:**

|   |             |            |             |
|---|-------------|------------|-------------|
| C | 1.05210500  | 4.85151400 | -0.00604600 |
| C | 2.11884600  | 3.76652800 | -0.00136200 |
| C | -0.35910500 | 4.29805500 | 0.11880700  |
| C | 2.71181200  | 3.35436100 | 1.19581900  |
| C | 2.51709400  | 3.13507300 | -1.19204500 |
| C | -1.11397400 | 3.99954000 | -1.01912400 |
| C | -0.93393100 | 4.04674200 | 1.37641200  |
| H | 2.38869000  | 3.83841900 | 2.10874900  |
| C | 3.66398900  | 2.33137400 | 1.22694700  |
| C | 3.47719100  | 2.11959300 | -1.16142400 |
| O | 1.91428900  | 3.57607300 | -2.34853100 |
| H | -0.66298400 | 4.18861300 | -1.98552300 |
| C | -2.39526900 | 3.44642800 | -0.92541100 |
| C | -2.21108000 | 3.48877100 | 1.46947400  |
| O | -0.17158700 | 4.38396000 | 2.47303200  |
| C | 4.05851400  | 1.69703500 | 0.03819800  |
| O | 4.25989500  | 1.88227400 | 2.38801300  |
| H | 3.77376500  | 1.60961900 | -2.06917900 |
| C | 2.31880400  | 2.98862900 | -3.57786500 |
| C | -2.95756300 | 3.16904000 | 0.33059000  |
| O | -3.16343700 | 3.13136100 | -2.03031200 |
| H | -2.64922600 | 3.26568200 | 2.43348200  |
| C | -0.73726000 | 4.20556100 | 3.75845600  |
| C | 5.05169900  | 0.54416100 | 0.04879000  |
| C | 3.95892400  | 2.55821100 | 3.59400400  |
| H | 3.39081600  | 3.13762200 | -3.76101300 |
| H | 1.75101800  | 3.50262600 | -4.35606400 |
| H | 2.09107800  | 1.91684700 | -3.61212300 |

|   |             |             |             |
|---|-------------|-------------|-------------|
| C | -4.32465500 | 2.51266900  | 0.46202100  |
| C | -2.79698400 | 3.70477000  | -3.27623100 |
| H | -1.65896300 | 4.78909600  | 3.88231100  |
| H | 0.00921500  | 4.56205000  | 4.47086200  |
| H | -0.95694100 | 3.14969900  | 3.96453000  |
| H | 5.68342800  | 0.60717500  | -0.84053800 |
| H | 5.69653800  | 0.63283600  | 0.92587500  |
| C | 4.35486800  | -0.80708200 | 0.07250200  |
| H | 4.22090800  | 3.62321400  | 3.54062300  |
| H | 4.56164200  | 2.08073500  | 4.36919800  |
| H | 2.89671500  | 2.47014500  | 3.85909800  |
| H | -4.79094600 | 2.85035100  | 1.39150300  |
| H | -4.95914200 | 2.83448100  | -0.36761100 |
| C | -4.24258400 | 0.99368200  | 0.46217000  |
| H | -2.68424900 | 4.79327300  | -3.19874400 |
| H | -3.60907600 | 3.47275100  | -3.96809900 |
| H | -1.86519100 | 3.27767200  | -3.66811000 |
| C | 3.99252200  | -1.39907300 | 1.28582800  |
| C | 4.01025900  | -1.46464000 | -1.12077000 |
| C | -4.39566700 | 0.26952400  | -0.72158100 |
| C | -3.95908500 | 0.27982600  | 1.64048100  |
| H | 4.25509400  | -0.87634900 | 2.19772700  |
| C | 3.28410200  | -2.60300600 | 1.32805100  |
| C | 3.29374500  | -2.66531700 | -1.07672800 |
| O | 4.41957000  | -0.86333900 | -2.28663600 |
| H | -4.60874900 | 0.82182300  | -1.62904900 |
| C | -4.23663300 | -1.12007600 | -0.75819600 |
| C | -3.79346300 | -1.10557700 | 1.60316700  |
| O | -3.85977100 | 1.02540500  | 2.79434600  |
| C | 2.91223900  | -3.24658000 | 0.13629900  |

|   |             |             |             |
|---|-------------|-------------|-------------|
| O | 2.90615700  | -3.22302700 | 2.50198000  |
| H | 2.99259600  | -3.16099800 | -1.99092200 |
| C | 4.01535100  | -1.44520300 | -3.52056600 |
| C | -3.91244600 | -1.82670500 | 0.40891600  |
| O | -4.35004600 | -1.85746900 | -1.92277900 |
| H | -3.54596300 | -1.66023300 | 2.49934600  |
| C | -3.63669700 | 0.33952800  | 4.01339600  |
| C | 2.08732900  | -4.52475000 | 0.15667800  |
| C | 3.33085900  | -2.64774400 | 3.72333900  |
| H | 4.40055400  | -2.46764000 | -3.62855900 |
| H | 4.45478300  | -0.81984200 | -4.30023300 |
| H | 2.92525700  | -1.43771900 | -3.62235700 |
| C | -3.66450400 | -3.32755100 | 0.38870700  |
| C | -5.11719900 | -1.30381400 | -2.98210400 |
| H | -4.43693900 | -0.38103200 | 4.22652900  |
| H | -3.62700200 | 1.10317400  | 4.79356300  |
| H | -2.67496200 | -0.18969800 | 4.01410900  |
| H | 2.31862700  | -5.11070300 | -0.73613000 |
| H | 2.36900900  | -5.12000300 | 1.02927400  |
| C | 0.58995800  | -4.26061400 | 0.20614400  |
| H | 4.42505000  | -2.57972700 | 3.78307800  |
| H | 2.97125400  | -3.31049600 | 4.51317100  |
| H | 2.90704800  | -1.64592500 | 3.87392500  |
| H | -4.10085200 | -3.77272000 | 1.28673100  |
| H | -4.16933100 | -3.75878900 | -0.47836800 |
| C | -2.18554600 | -3.68032300 | 0.33125500  |
| H | -6.09147200 | -0.94794900 | -2.62502900 |
| H | -5.26639200 | -2.10959300 | -3.70378100 |
| H | -4.59714600 | -0.47616900 | -3.48043400 |
| C | -0.16189000 | -4.10099800 | -0.97111600 |

|   |             |             |             |
|---|-------------|-------------|-------------|
| C | -0.07025700 | -4.14612200 | 1.43178300  |
| C | -1.43642100 | -3.86174600 | 1.50465900  |
| C | -1.52898800 | -3.81184300 | -0.89804500 |
| O | 0.52480800  | -4.25614700 | -2.15223600 |
| H | 0.52159300  | -4.25942700 | 2.33098600  |
| O | -2.12331300 | -3.74132900 | 2.69604400  |
| H | -2.11417600 | -3.67670000 | -1.80020400 |
| C | -0.19129500 | -4.15254600 | -3.37081300 |
| C | -1.42814600 | -4.02658000 | 3.89651500  |
| H | -1.00994500 | -4.88197300 | -3.42417900 |
| H | 0.52925900  | -4.36436900 | -4.16252300 |
| H | -0.59531300 | -3.14423200 | -3.52214600 |
| H | -1.02484300 | -5.04749500 | 3.89994700  |
| H | -2.15938100 | -3.92836600 | 4.70128700  |
| H | -0.60452600 | -3.32142600 | 4.06999300  |
| C | -0.12536500 | -0.18152800 | -2.79693900 |
| C | -1.57479300 | -0.03590600 | -3.21711600 |
| C | 0.16643700  | -0.08454300 | -1.31766000 |
| O | 0.74941400  | -0.36879800 | -3.63141900 |
| H | -2.03236000 | 0.84548300  | -2.75603700 |
| H | -2.14627300 | -0.90118300 | -2.86078700 |
| H | -1.63934300 | 0.02238300  | -4.30552300 |
| H | 1.20159000  | -0.35663500 | -1.11237800 |
| H | -0.51258800 | -0.72847700 | -0.74892700 |
| H | -0.01234900 | 0.94401100  | -0.98108900 |
| H | 1.12647100  | 5.42214000  | -0.93529700 |
| H | 1.24169300  | 5.53776100  | 0.82344900  |

## 5. References

- [S1] L. Pauling, The nature of the chemical bond, Cornell University Press, Ithaca, NY, 1939.
